# Supplementary material for: Effective ion pathways and 3D conductive carbon networks in bentonite host enable stable and high-rate lithium–sulfur batteries
Source: publisher site journal article supplement (doi:10.1515/ntrev-2021-0005), 2021-01-01
Supplement: Supplementary file 1 [file ntrev-2021-0005_sm.pdf]

5 Supplementary material

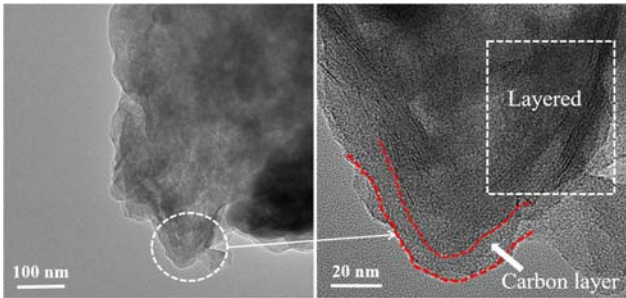

Figure S1: TEM images of Bent@C.

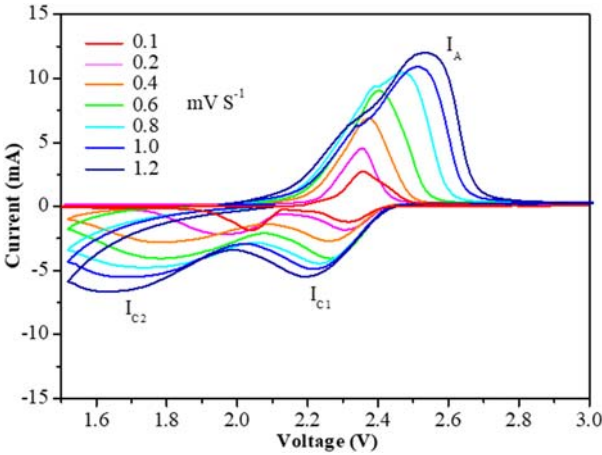

Figure S3: CV tests of Li-Bent/S electrode under different scanning rates ranging from 0.1 to 1.2 mV/s between 1.5 and 3.0 V (vs Li/Li<sup>+</sup>).

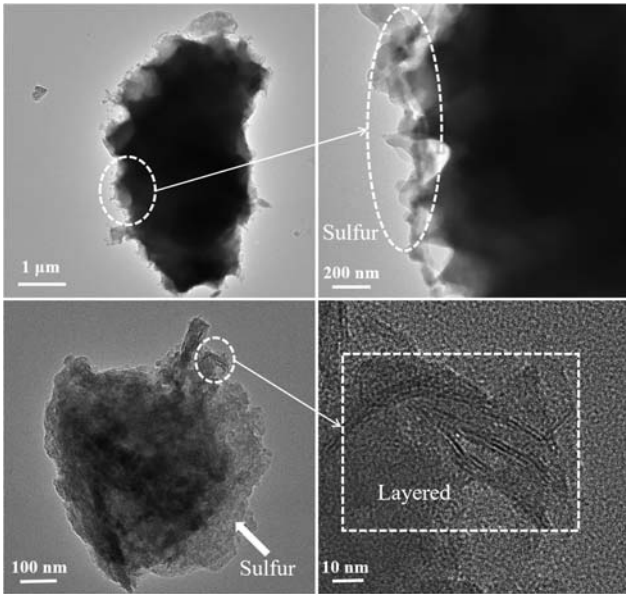

Figure S2: TEM images of S/Bent@C.

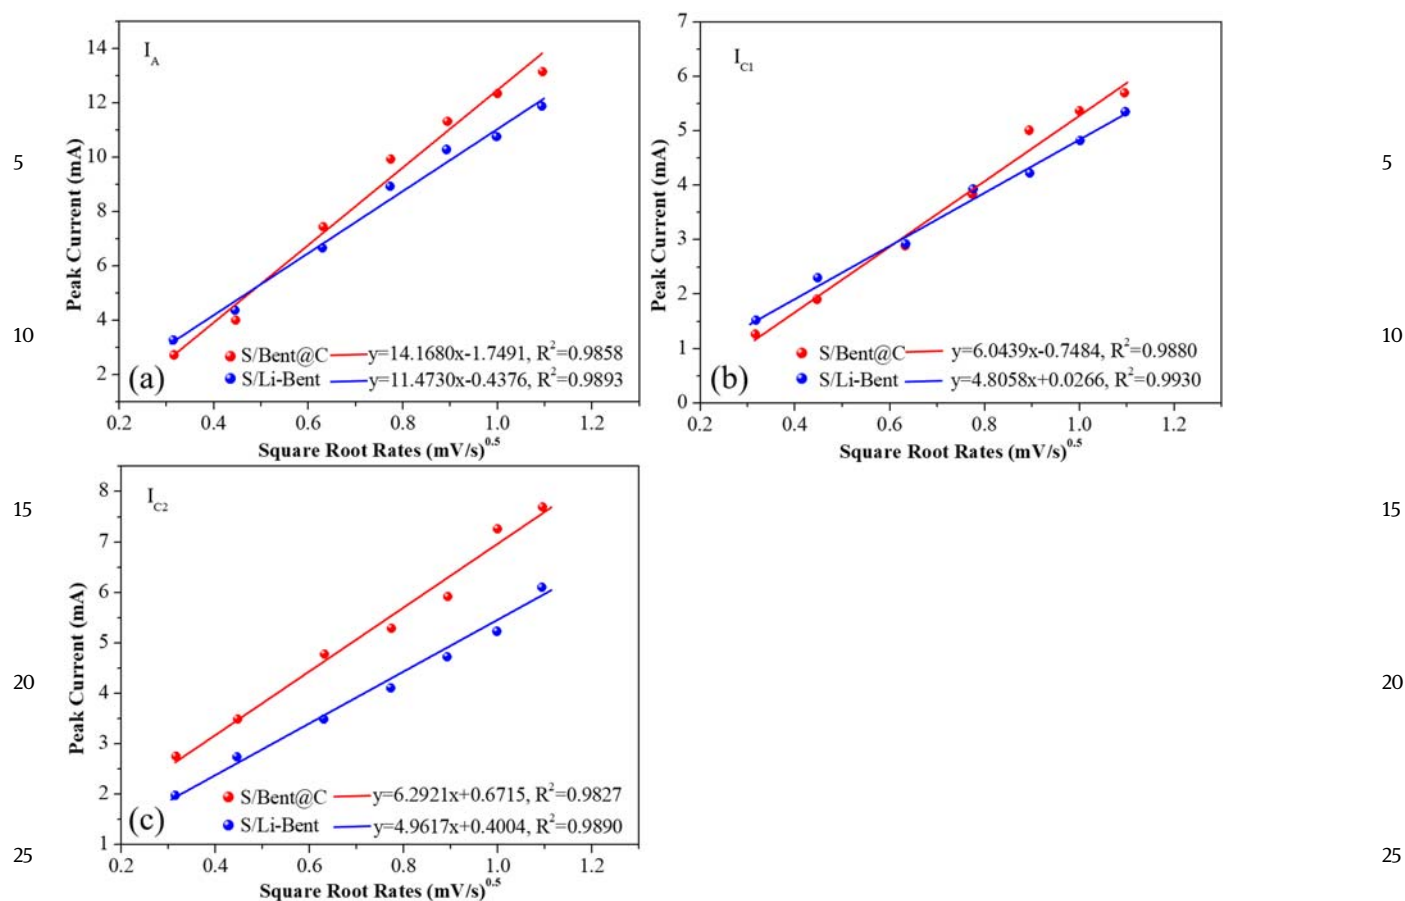

**Figure S4:** The correlation between peak current and the square root of the scan rates in (a) the anodic oxidation process ( $I_A$ ), (b) first cathodic reduction process ( $I_{C1}$ ) and (c) second cathodic reduction process ( $I_{C2}$ ), respectively.

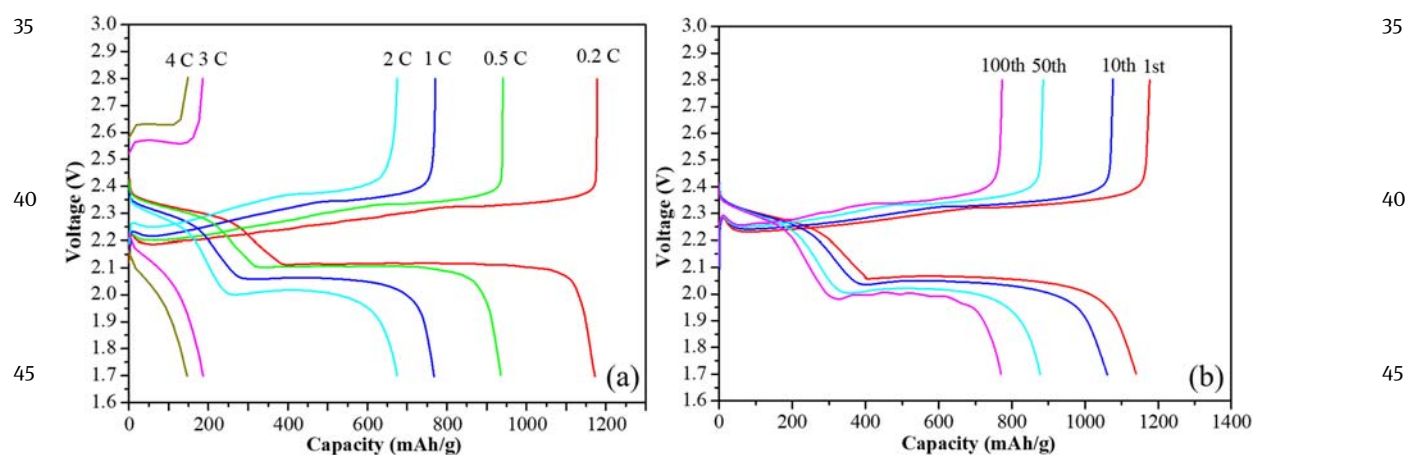

**Figure S5:** Galvanostatic charge/discharge profiles of S/Li-Bent electrodes at various C-rates with a sulfur loading of 1.2 mg cm<sup>-2</sup> (a), and at different cycles with a sulfur loading of 2 mg cm<sup>-2</sup> (b).

**Table S1:** Values of  $R_s$ ,  $R_{SEI}$ , and  $R_{ct}$  for various Li–S cells

| Electrode used in the Li–S cell | $R_s$ ( $\Omega$ ) | $R_{SEI}$ ( $\Omega$ ) | $R_{ct}$ ( $\Omega$ ) |
|---------------------------------|--------------------|------------------------|-----------------------|
| S/Bent@C                        | 2.1                | 2.8                    | 15.6                  |
| S/Li-Bent                       | 4.3                | 19.615                 | 39.29                 |
